# Supplementary material for: Novel Chloroflexi genomes from the deepest ocean reveal metabolic strategies for the adaptation to deep-sea habitats
Source: Research Square preprint supplement (doi:10.21203/rs.3.rs-254541/v1), 2021-03-01
Supplement: Supplementary file 1 [file 4f1c3b7c33cae7068f0831fa.docx]

**Additional file 3**

**Novel *Chloroflexi* genomes from the deepest ocean reveal metabolic strategies for the adaptation to deep**-**sea habitats**

Rulong Liu1, 2*, Xing Wei1, 2, Li Wang1, 2, Junwei Cao1, 2, Weizhi Song3*, Jiaxin Wu1, 2, Torsten Thomas3,Tao Jin4, Wenxia Wei1, 2, Yuli Wei1, 2, Haofeng Zhai1, 2, Cheng Yao1, 2, Ziyi Shen1, 2, Jiasong Fang1, 5, 6*

1 Shanghai Engineering Research Center of Hadal Science and Technology, College of Marine Sciences, Shanghai Ocean University, Shanghai, China

2National Engineering Research Center for Oceanic Fisheries, Shanghai Ocean University, Shanghai, China

3 Centre for Marine Science & Innovation and School of Biological Earth and Environmental Science, University of New South Wales, Kensington, Australia

4 BGI-Shenzhen, Shenzhen, Guangdong, China.

5 Laboratory for Marine Biology and Biotechnology, Qingdao National Laboratory for Marine Science and Technology, Qingdao, China

6 Department of Natural Sciences, Hawaii Pacific University, Honolulu, HI, USA

***Correspondence:**

**Rulong Liu**, [rlliu@shou.edu.cn](mailto:rlliu@shou.edu.cn), **Weizhi Song**, weizhi.song@unsw.edu.au and **Jiasong Fang**, jsfang@shou.edu.cn

**Taxonomy names proposed for the six MAGs qualified as type material:**

Six MAGs including MT 6_15, MT 4_27, MT2_13, MT2_3, MT6_13 and MT4_14, showed completeness of >80% and contaminations lower than 3.6% (Table 1), and are qualified as type materials according to the criteria defined recently for taxonomy of uncultivated prokaryotes [1, 2]. We propose the names Candidatus *Aerodehalococcoidaceae* (fam. nov.) and Ca. *Aerodehalococcoides hadale* (genus nov. and species nov.) for MT6_15, for its capability of dehalogenation and for being recovered from oxygenic surface sediment of the hadal zone. MT 4_27 was putatively named as Ca. *Pseudodehalococcoides chloroalkanivoran*s (genus nov. and species nov.) for its capability of degradation of chloroalkanes via hydrolytic pathways, and the higher ranks were named as family “Ca. *Pseudodehalococcoidaceae*” (GTDB family RBG-16-64-32) and order “Ca. *Pseudodehalococcoidales*” (GTDB order SM2-28-2). MT2_13 was putatively named as Ca. *Aromodehalococcoides marianensis* (species nov.) for its capability to degrade organic halides and aromatic compounds, and the higher ranks were putatively named as genus Ca. *Aromadehalococcoides* (GTDB: UBA1328), family Ca. *Aromadehalococcoidaceae* (GTDB: Bin127) and order Ca. *Aromadehalococcoidales* (GTDB: UBA1151). MT2_3, MT6_13 and MT4_14 belong to the family UBA3495 of the order UBA3495 (former SAR202 group III), which have been putatively named *Monstramariaceae* and *Monstramariales* in Saw et al. [3]. We decided to adopt these order and family names and name MT2_3 as Ca. *Monstradehalococcoides dehalogenans* (genus nov., species nov.), MT6_13 as Ca. *Monstramaris marianensis* (species nov.) and MT4_14 as Ca. *Monstramaris hadale* (species nov.).

Aerodehalococcoides Gr. masc. n. aer (gen. aeros), air; N.L. masc. n. dehalococcoides, a bacterial genus name; N.L. masc. n. Aerodehalococcoides, aerobic Dehalococcoides

Pseudodehalococcoides Gr. masc./fem. adj. pseudês, false; N.L. masc. n. dehalococcoides, a bacterial genus; N.L. masc. n. Pseudodehalococcoides, false Dehalococcoides

Aromadehalococcoides L. neut. n. aroma (gen. aromatis), spice; N.L. masc. n. dehalococcoides, a bacterial genus; N.L. masc. n. Aromadehalococcoides, Dehalococcoides degrading aromatic compounds.

**References:**

1. Parks DH, Chuvochina M, Chaumeil PA, Rinke C, Mussig AJ, Hugenholtz P. A complete domain-to-species taxonomy for Bacteria and Archaea. Nat Biotechnol. 2020;38:1079-86.

2. Murray AE, Freudenstein J, Gribaldo S, Hatzenpichler R, Hugenholtz P, Kämpfer P, et al. Roadmap for naming uncultivated Archaea and Bacteria. Nat Microbiol. 2020;5:987-94.

3. Saw JHW, Nunoura T, Hirai M, Takaki Y, Parsons R, Michelsen M, et al. Pangenomics Analysis Reveals Diversification of Enzyme Families and Niche Specialization in Globally Abundant SAR202 Bacteria. mBio. 2020;11:e02975-19.
